# Supplementary material for: Towards Standardization of Data Normalization Strategies to Improve Urinary Metabolomics Studies by GC×GC-TOFMS
Source: PubMed Central journal article supplement (PMC7570207; doi:10.3390/metabo10090376), 2020-09-19
Supplement: metabolites-10-00376-s001.pdf [file metabolites-10-00376-s001.pdf]

## Supporting Information

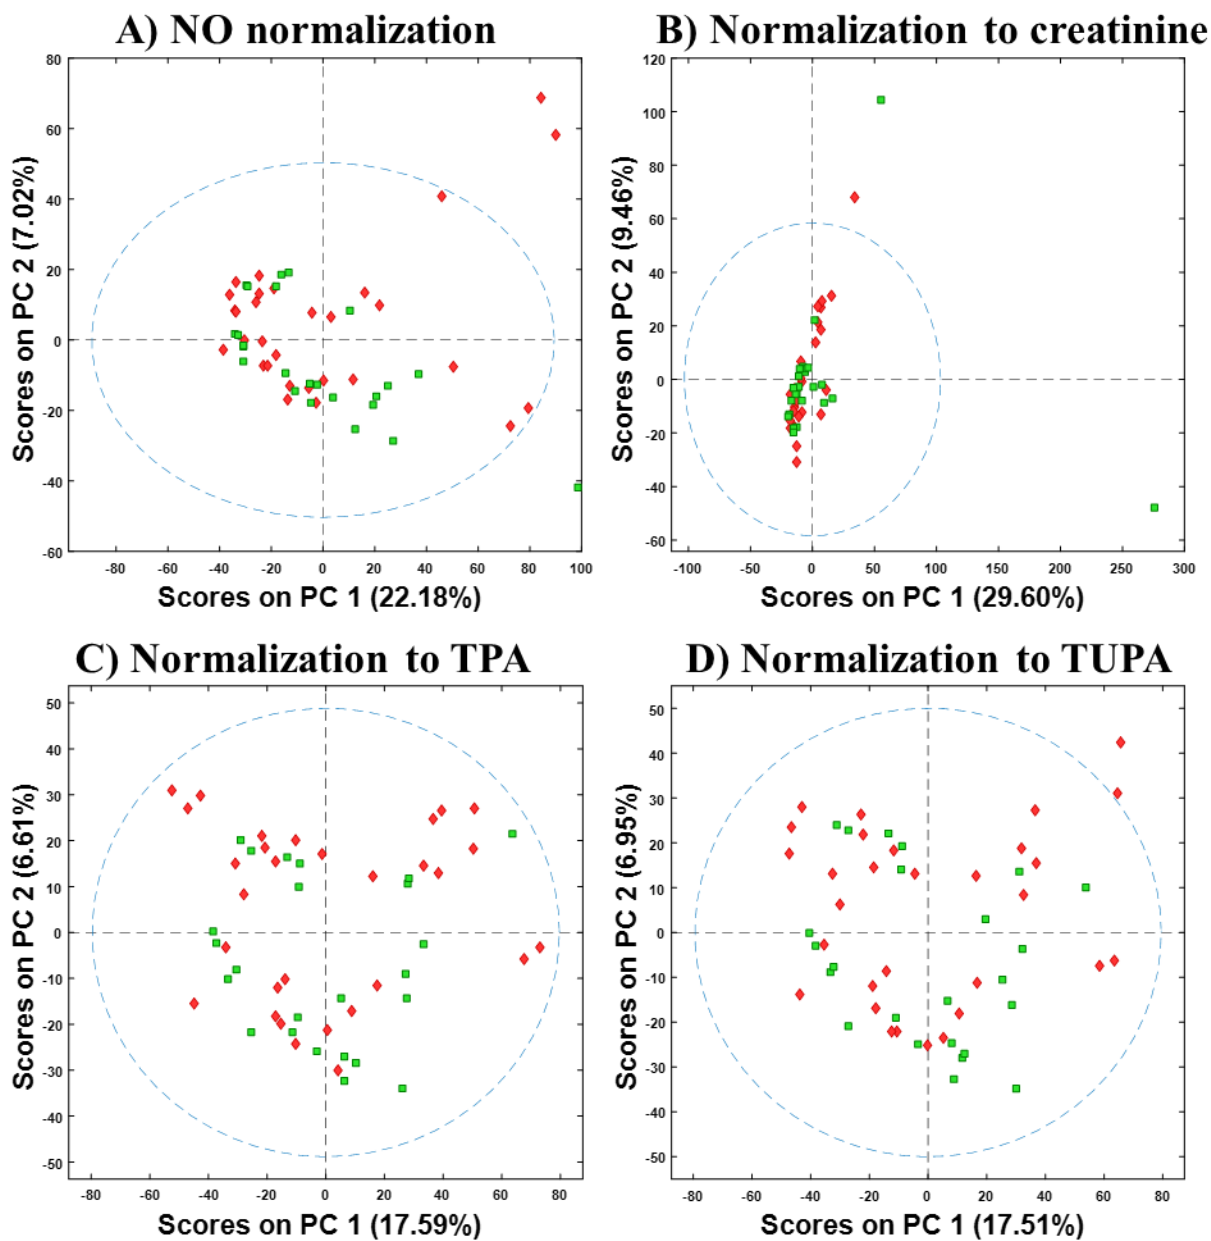

Figure S1: PCA score plots for different normalization methods before applying any feature selection. Each dataset was 54 samples  $\times$  5572 compounds.
